# Supplementary material
Source: publisher figshare collection journal article supplement (https://acs.figshare.com/ndownloader/files/4838947)
Supplement: Supplementary file 1 [file 4838947]

**A broadly applicable strategy for the fluorescence based detection and differentiation of glutathione and cysteine/homocysteine: Demonstration in-vitro and in-vivo**

Wenqiang Chen,<sup>‡ab</sup> Hongchen Luo,<sup>‡a</sup> Xingjiang Liu,<sup>a</sup> James W. Foley<sup>c</sup> and Xiangzhi Song<sup>a</sup>

<sup>a</sup>*College of Chemistry & Chemical Engineering, Central South University, 410083 Changsha, Hunan Province, P. R. China.*

<sup>b</sup>*College of Chemistry and Materials Science, Guangxi Teachers Education University, 530001 Nanning, Guangxi, P. R. China.*

<sup>c</sup>*Rowland Institute at Harvard, Harvard University, 02142, 100 Edwin H. Land Blvd, Cambridge, MA, USA.*

<sup>‡</sup>*These authors contributed equally to this work.*

*\*Corresponding author: X. S., Telephone: +86-731-88836954, Fax: +86-731-88836954, E-mail: song@rowland.harvard.edu.*

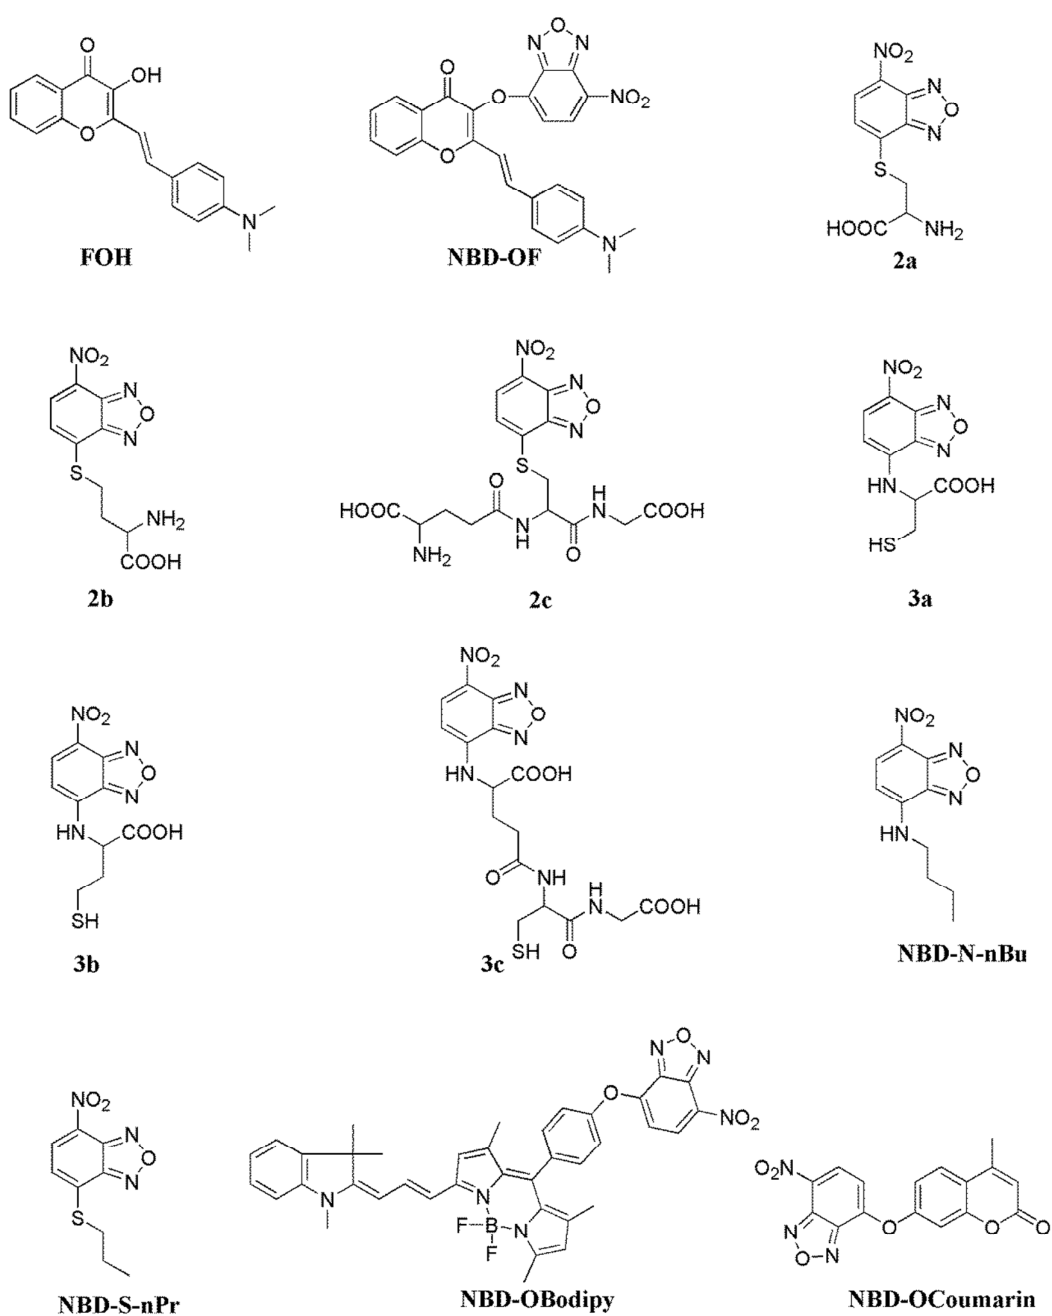

**Figure S1.** Chemical structures and the corresponding names of the compounds in this work.

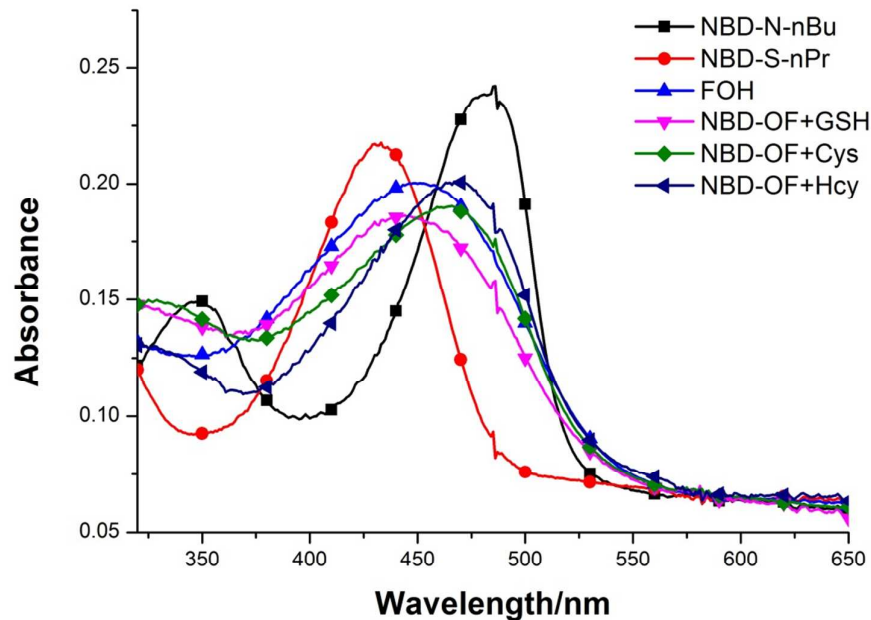

**Figure S2.** UV-vis absorption spectra of **NBD-N-nBu** (10.0  $\mu$ M), **NBD-S-nPr** (10.0  $\mu$ M), **FOH** (10.0  $\mu$ M) and **NBD-OF** (10.0  $\mu$ M) with 100 equiv. of Cys, Hcy and GSH in PBS buffer (10 mM, pH 7.4, containing 30% CH<sub>3</sub>CN, v/v).

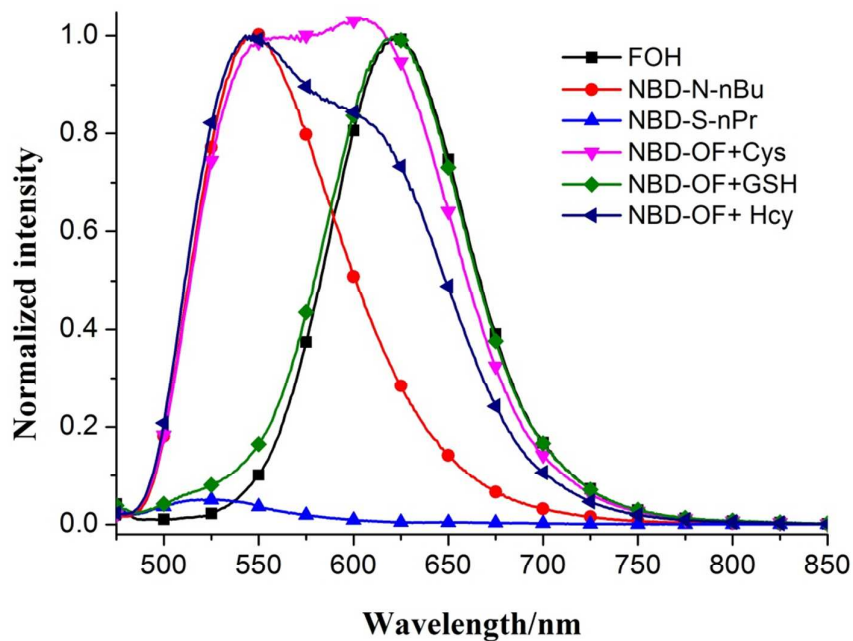

**Figure S3.** Normalized fluorescence spectra of **FOH**, **NBD-N-nBu**, **NBD-S-nPr**, **NBD-OF** with 100 equiv. of Cys, GSH and Hcy in PBS buffer (10 mM, pH 7.4, containing 30% CH<sub>3</sub>CN, v/v)

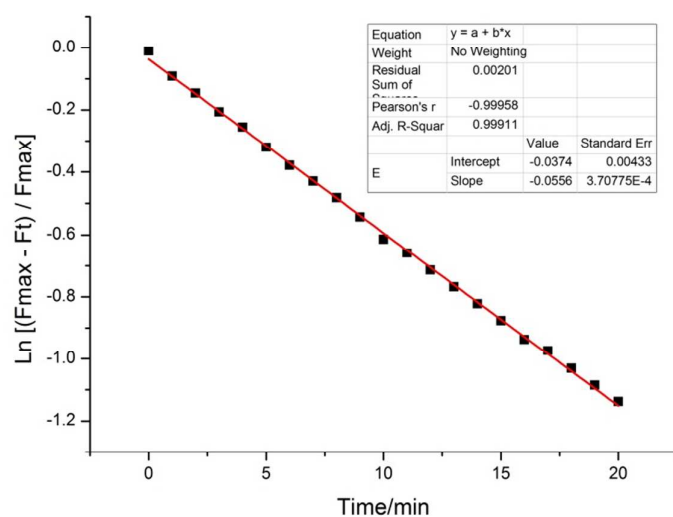

**Figure S4.** The natural log of fluorescence intensity change plotted as a function of time for the reaction of **NBD-OF** (5.0  $\mu\text{M}$ ) with Cys (100 equiv.) in PBS buffer (10.0 mM, pH 7.4, containing 30%  $\text{CH}_3\text{CN}$ , v/v). Slope =  $5.56 \times 10^{-2} \text{ min}^{-1}$ .

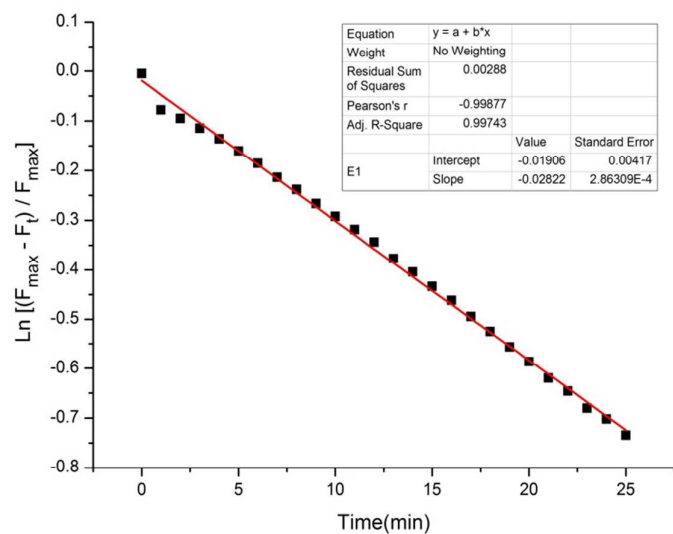

**Figure S5.** The natural log of fluorescence intensity change plotted as a function of time for the reaction of **NBD-OF** (5.0  $\mu\text{M}$ ) with Hcy (100 equiv.) in PBS buffer (10.0 mM, pH 7.4, containing 30%  $\text{CH}_3\text{CN}$ , v/v). Slope =  $2.82 \times 10^{-2} \text{ min}^{-1}$ .

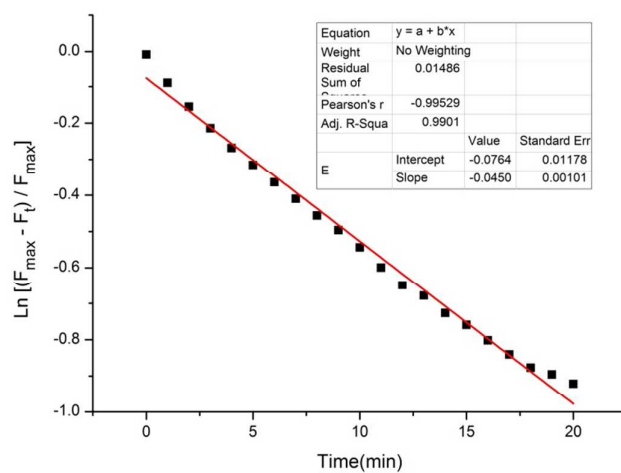

**Figure S6.** The natural log of fluorescence intensity change plotted as a function of time for the reaction of **NBD-OF** ( $5.0 \mu\text{M}$ ) with GSH (100 equiv.) in PBS buffer (10.0 mM, pH 7.4, containing 30%  $\text{CH}_3\text{CN}$ , v/v). Slope =  $4.50 \times 10^{-2} \text{ min}^{-1}$ .

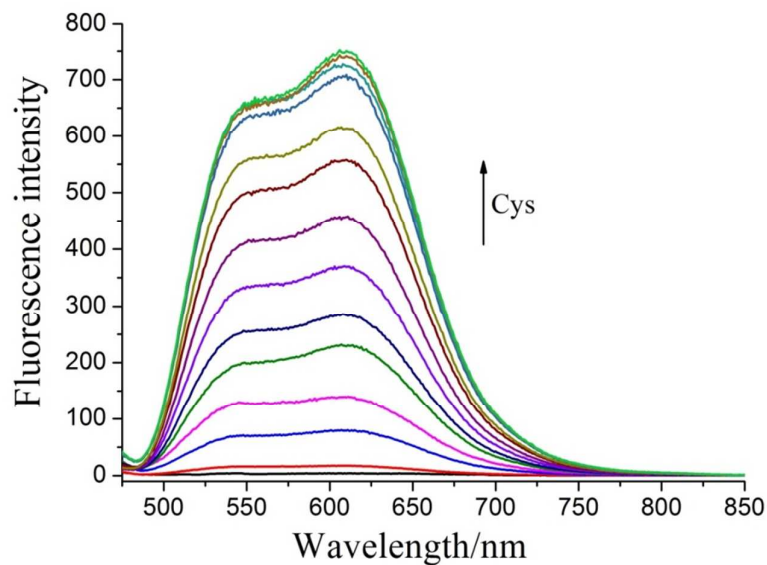

**Figure S7.** Fluorescence spectra of **NBD-OF** ( $5.0 \mu\text{M}$ ) with different concentrations of Cys (0.0-600.0  $\mu\text{M}$ ) in PBS buffer (10 mM, pH 7.4, containing 30%  $\text{CH}_3\text{CN}$ , v/v).

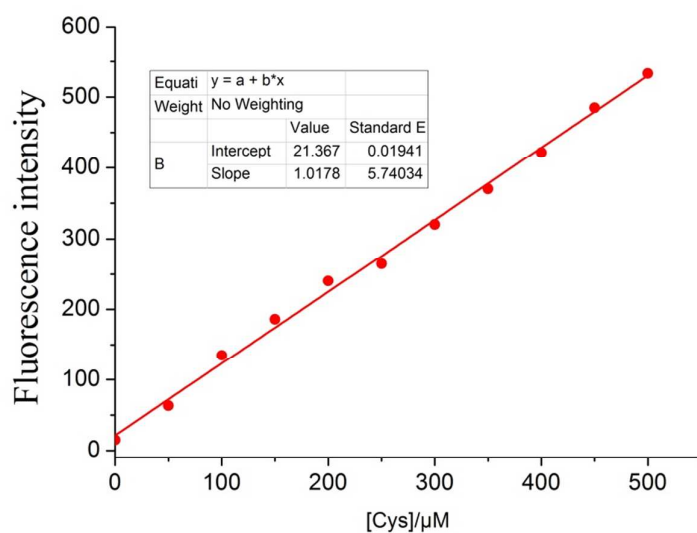

**Figure S8.** The linear relationship between the fluorescence intensity of **NBD-OF** (5.0  $\mu\text{M}$ ) at 545 nm and the concentration of Cys (0.0–500.0  $\mu\text{M}$ ) in PBS buffer (10 mM, pH 7.4, containing 30%  $\text{CH}_3\text{CN}$ , v/v).

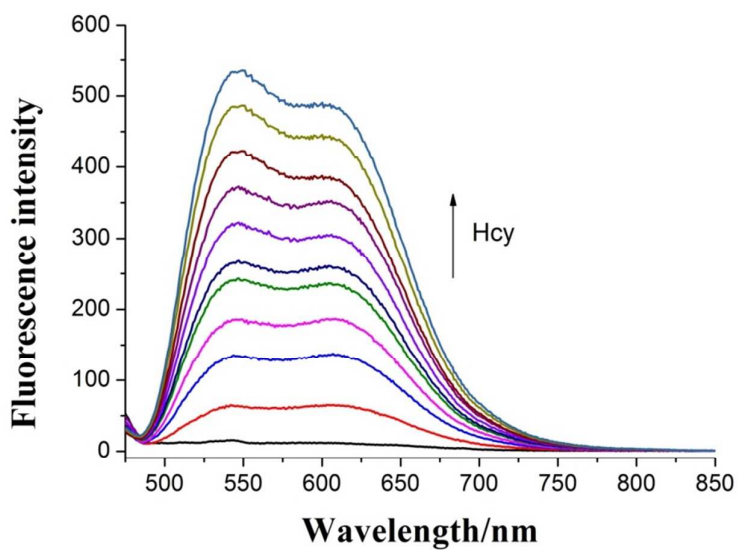

**Figure S9.** Fluorescence spectra of **NBD-OF** with different concentrations of Hcy (0.0–500.0  $\mu\text{M}$ ) in PBS buffer (10 mM, pH 7.4, containing 30%  $\text{CH}_3\text{CN}$ , v/v).

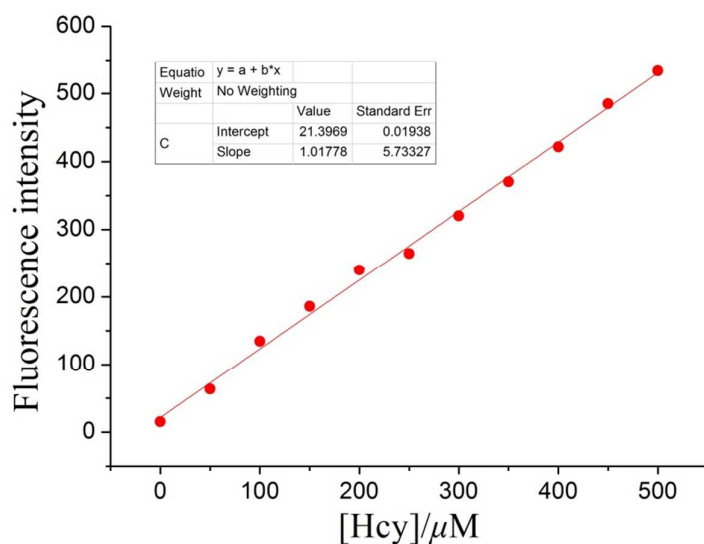

**Figure S10.** The linear relationship between the fluorescence intensity of **NBD-OF** (5.0  $\mu\text{M}$ ) at 545 nm and the concentrations of Hcy (0.0–500.0  $\mu\text{M}$ ) in PBS buffer (10 mM, pH 7.4, containing 30%  $\text{CH}_3\text{CN}$ , v/v).

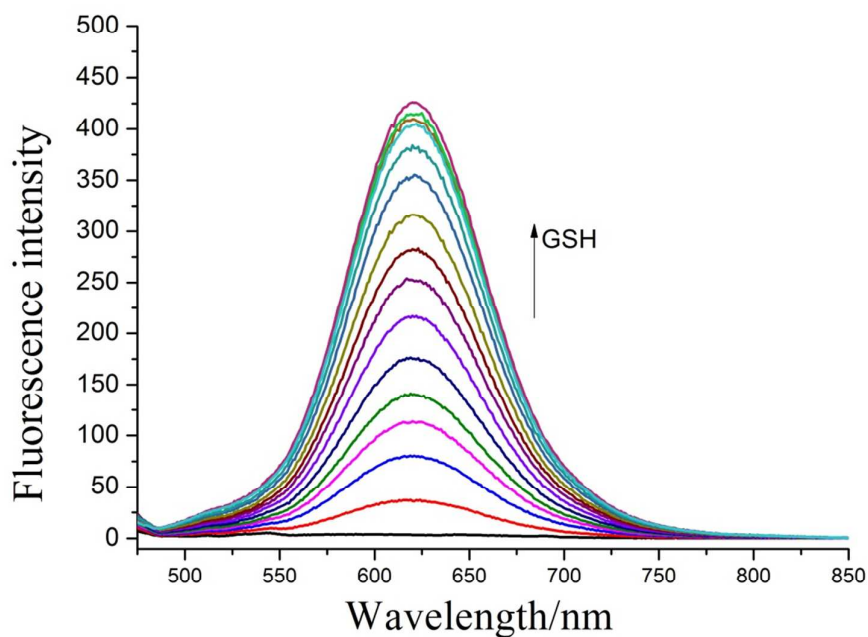

**Figure S11.** Fluorescence spectra of **NBD-OF** after addition of increasing concentrations of GSH (0.0–700.0  $\mu\text{M}$ ) in PBS buffer (10 mM, pH 7.4, containing 30%  $\text{CH}_3\text{CN}$ , v/v).

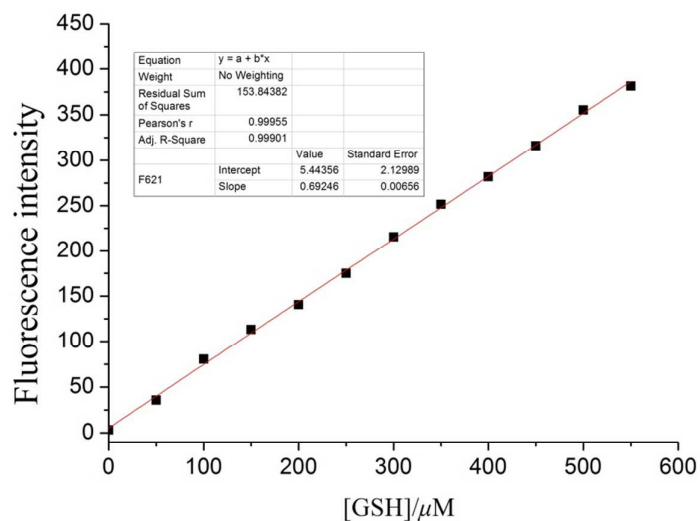

**Figure S12.** The linear relationship between the fluorescence intensity of **NBD-OF** (5.0  $\mu\text{M}$ ) at 545 nm and the concentrations of GSH (0.0–550.0  $\mu\text{M}$ ) in PBS buffer (10 mM, pH 7.4, containing 30%  $\text{CH}_3\text{CN}$ , v/v).

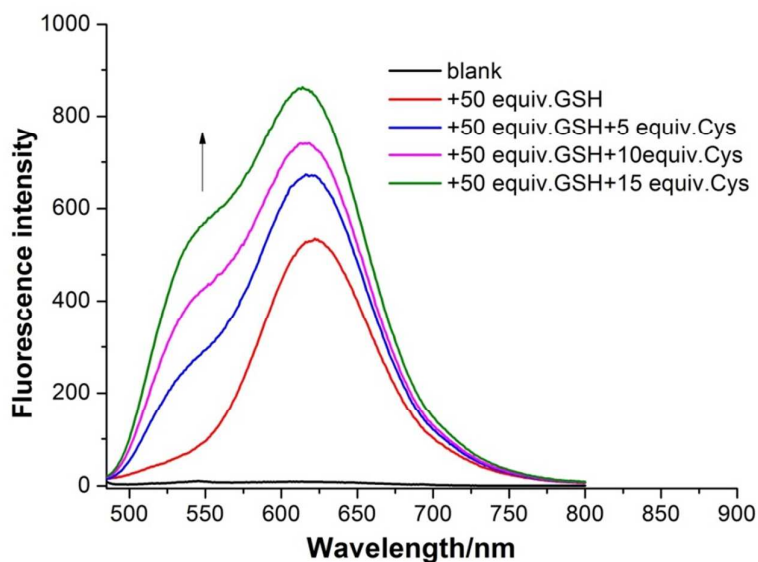

**Figure S13.** The fluorescence spectra of **NBD-OF** (5  $\mu\text{M}$ ) after incubation with 50 equiv. of GSH and different concentrations of Cys (0.0  $\mu\text{M}$ , 25.0  $\mu\text{M}$ , 50.0  $\mu\text{M}$ , 75.0  $\mu\text{M}$ ) in PBS buffer (10.0 mM, pH 7.4, containing 30%  $\text{CH}_3\text{CN}$ , v/v) for 2 hours.



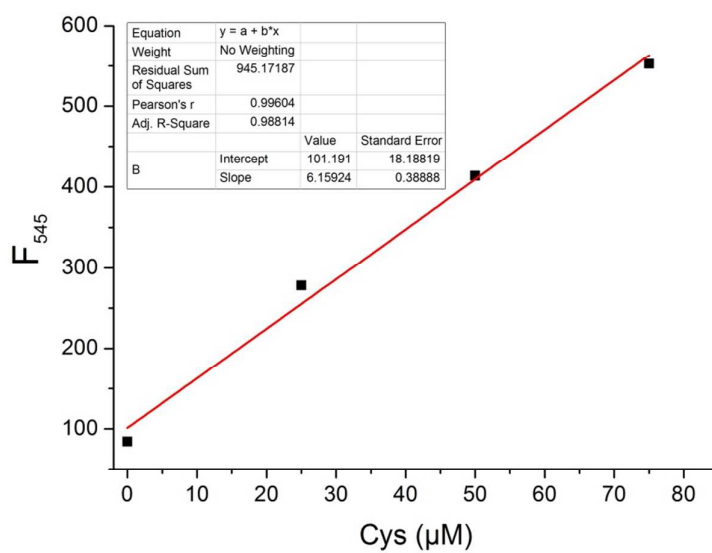

**Figure S14.** The linear relationship between the fluorescence intensity of **NBD-OF** (5.0 μM) at 545 nm and the concentrations of Cys (0.0–75.0 μM) in PBS buffer (10 mM, pH 7.4, containing 30% CH<sub>3</sub>CN, v/v).

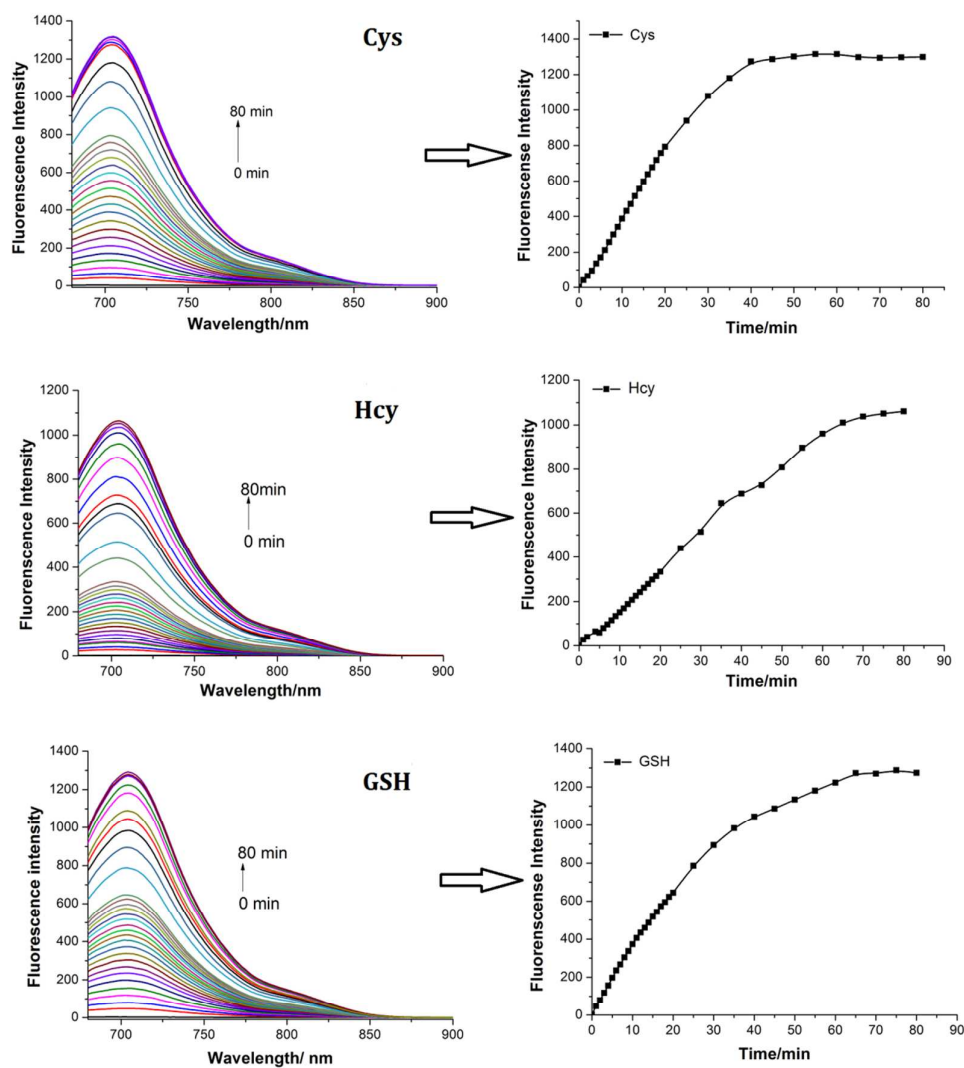

**Figure S15.** Time-dependent fluorescence spectra (left rows) and the corresponding fluorescence intensity changes at 705nm (right rows) of **NBD-OBodipy** (5.0  $\mu$ M) in the presence of 10.0 equiv. of Cys, Hcy and GSH in PBS buffer (10 mM, pH 7.4, containing 1.0 mM CTAB). Excitation wavelength is at 650 nm.

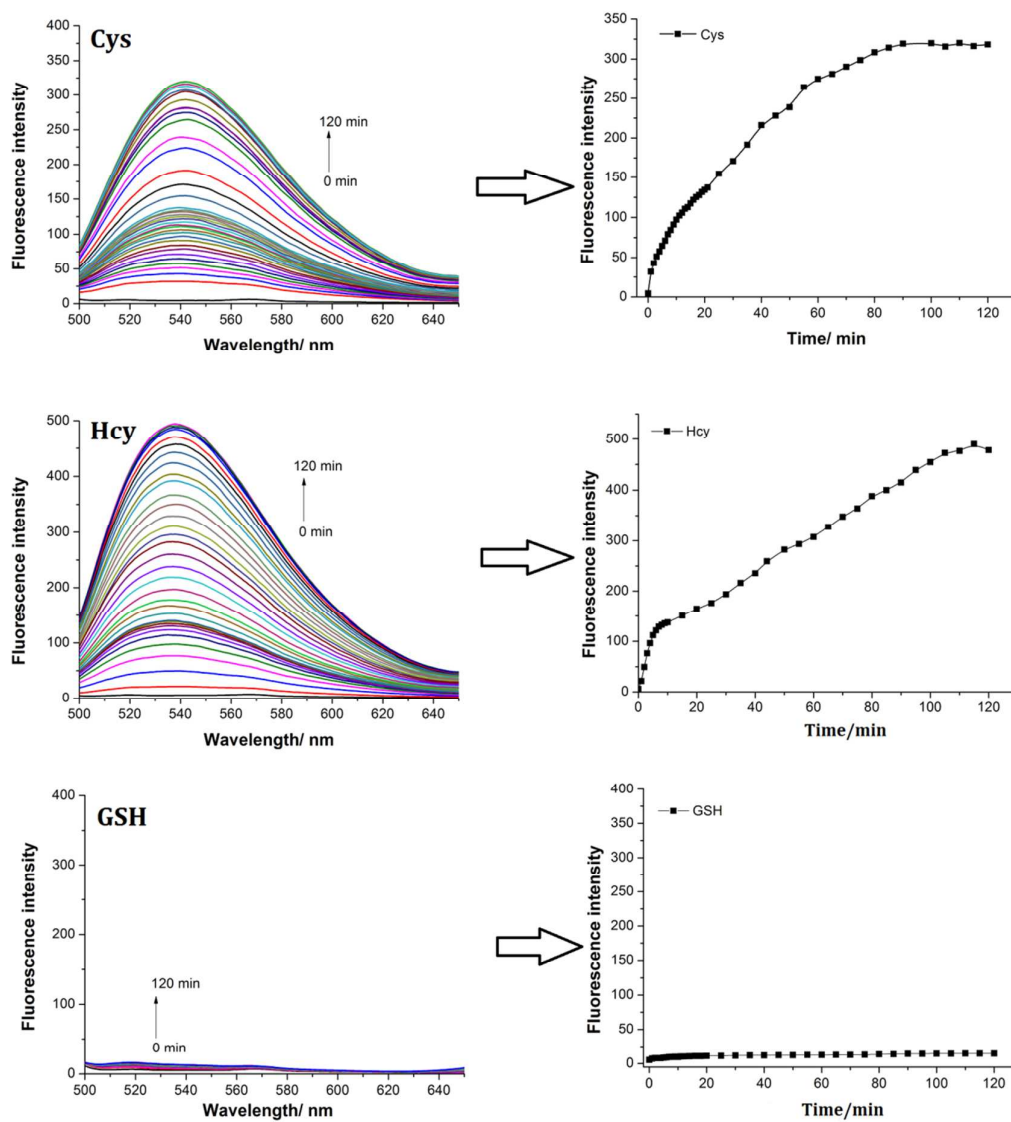

**Figure S16.** Time-dependent fluorescence spectra (left rows) and the corresponding fluorescence intensity changes at 545nm (right rows) of **NBD-OBodipy** (5.0  $\mu\text{M}$ ) in the presence of 10.0 equiv. of Cys, Hcy and GSH in PBS buffer (10 mM, pH 7.4, containing 1.0 mM CTAB). Excitation wavelength is at 476 nm.

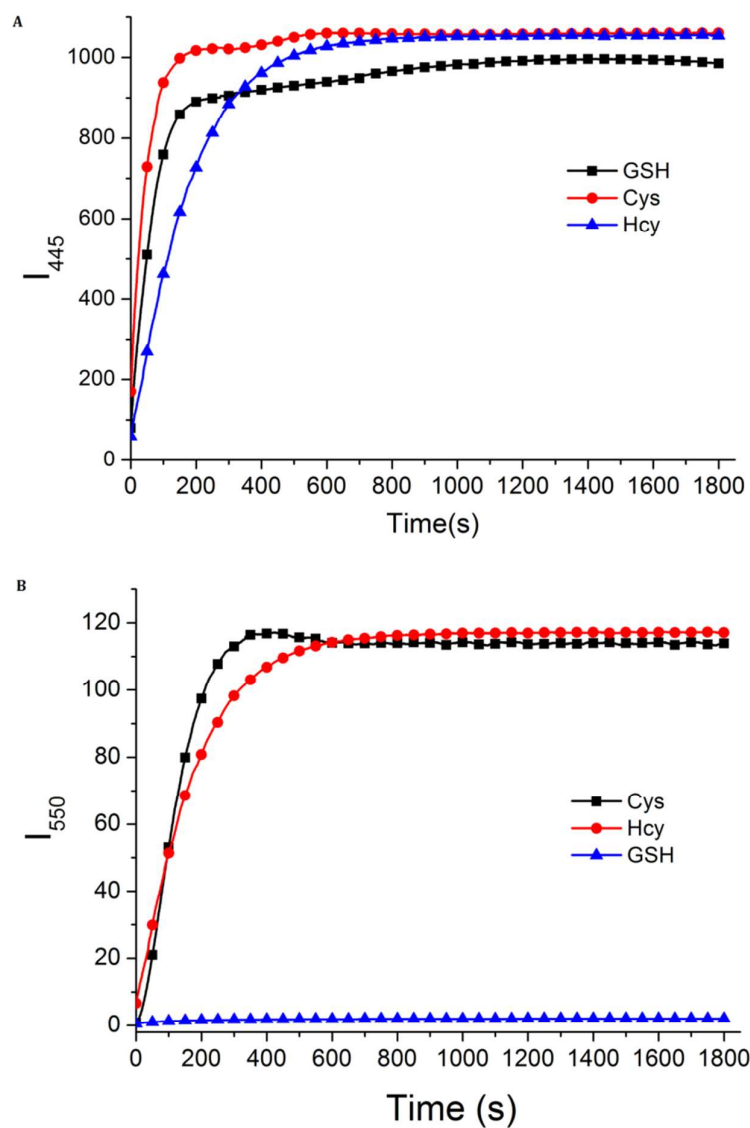

**Figure S17.** Time-dependent fluorescence intensity changes of **NBD-OCoumarin** toward 20.0 equiv. of Cys, Hcy and GSH when excited at 380 nm (A) and 476 nm (B) in PBS buffer (10 mM, pH 7.4, containing 30% CH<sub>3</sub>CN, v/v).

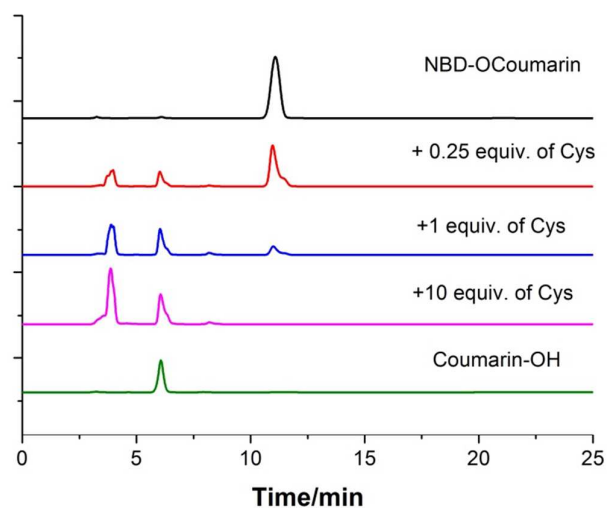

**Figure S18.** HPLC chromatograms of **NBD-OCoumarin**, **NBD-OCoumarin** with different amounts of Cys measured after 30 min mixing, and **Coumarin-OH**. The concentrations of both **NBD-OCoumarin** and **Coumarin-OH** were 100.0  $\mu\text{M}$ . Conditions: eluent,  $\text{CH}_3\text{CN}/\text{H}_2\text{O}$ ; gradient, 70%  $\text{CH}_3\text{CN}$ ; flow rate, 0.5 mL/min; temperature, 25  $^\circ\text{C}$ ; detection wavelength, 350 nm; injection volume, 20.0  $\mu\text{L}$ .

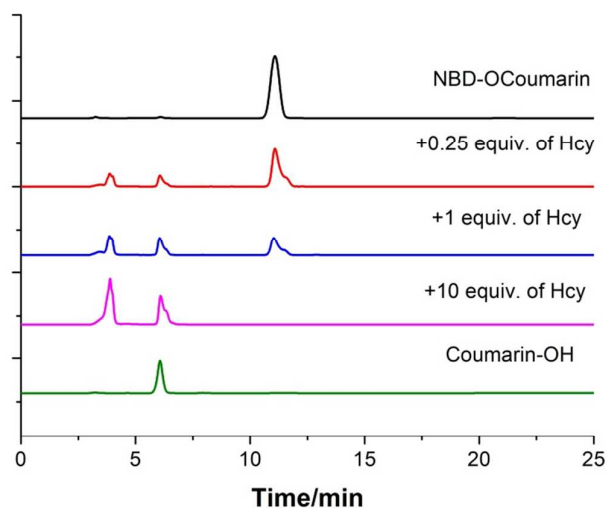

**Figure S19.** HPLC chromatograms of **NBD-OCoumarin**, **NBD-OCoumarin** with different amounts of Hcy measured after 30 min mixing, and **Coumarin-OH**. The concentrations of both **NBD-OCoumarin** and **Coumarin-OH** were 100.0  $\mu\text{M}$ . Conditions: eluent,  $\text{CH}_3\text{CN}/\text{H}_2\text{O}$ ; gradient, 70%  $\text{CH}_3\text{CN}$ ; flow rate, 0.5 mL/min; temperature, 25  $^\circ\text{C}$ ; detection wavelength, 350 nm; injection volume, 20.0  $\mu\text{L}$ .

temperature, 25 °C; detection wavelength, 350 nm; injection volume, 20.0  $\mu$ L.

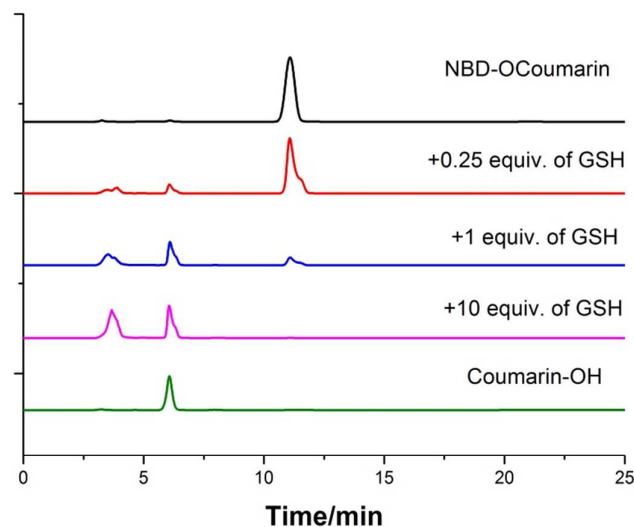

**Figure S20.** HPLC chromatograms of **NBD-OCoumarin**, **NBD-OCoumarin** with different amounts of GSH measured after 30 min mixing, and **Coumarin-OH**. The concentrations of both **NBD-OCoumarin** and **Coumarin-OH** were 100.0  $\mu$ M. Conditions: eluent, CH<sub>3</sub>CN/H<sub>2</sub>O; gradient, 70% CH<sub>3</sub>CN; flow rate, 0.5 mL/min; temperature, 25 °C; detection wavelength, 350 nm; injection volume, 20.0  $\mu$ L.

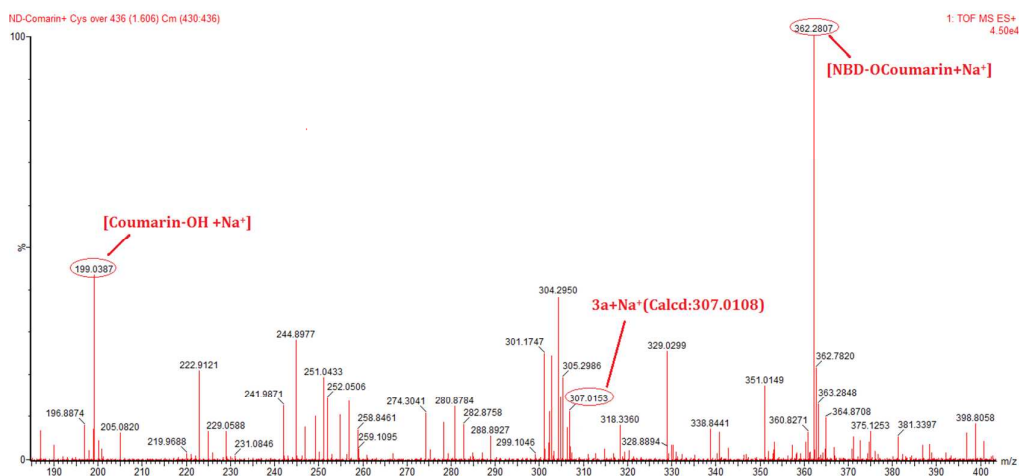

**Figure S21.** HRMS spectrum of **NBD-OCoumarin** with 5.0 equiv. of Cys in PBS buffer (10 mM, pH 7.4, containing 30% CH<sub>3</sub>CN).

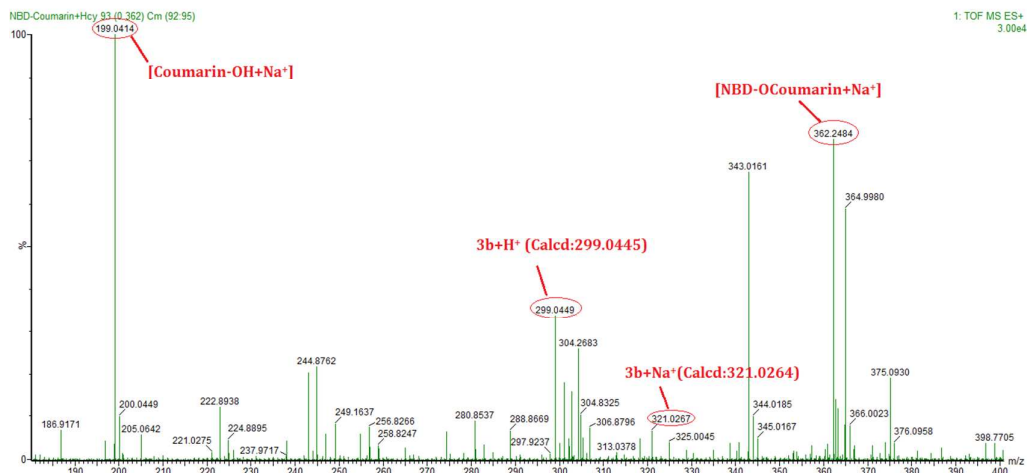

**Figure S22.** HRMS spectrum of NBD-OCoumarin with 5.0 equiv. of Hcy in PBS buffer (10 mM, pH 7.4, containing 30% CH<sub>3</sub>CN).

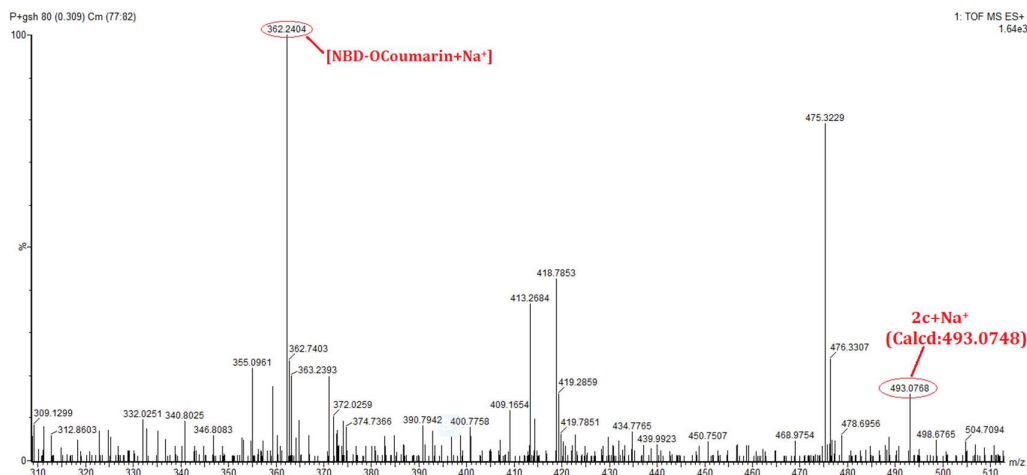

**Figure S23.** HRMS spectrum of NBD-OCoumarin with 5.0 equiv. of GSH in PBS buffer (10 mM, pH 7.4, containing 30% CH<sub>3</sub>CN).

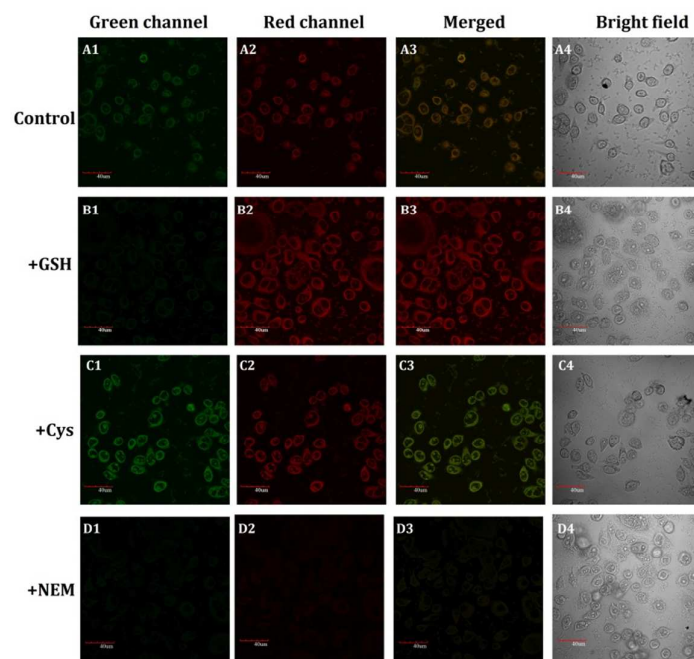

**Figure S24.** Confocal microscopic images of Cys and GSH in HeLa cells. (A1-A4) HeLa cells incubated with 5.0  $\mu\text{M}$  **NBD-OBodipy**. (B1-B4) HeLa cells pre-treated with 1.0 mM GSH and then incubated with 5.0  $\mu\text{M}$  **NBD-OBodipy**. (C1-C4) HeLa cells pre-treated with 1.0 mM Cys and then incubated with 5.0  $\mu\text{M}$  **NBD-OBodipy**. (D1-D4) HeLa cells pre-treated with 1.0 mM NEM and then incubated with 5.0  $\mu\text{M}$  **NBD-OBodipy**. Emission was collected at 500-550 nm for green channel (excited at 476 nm) and 650-710 nm for red channel (excited at 633 nm). Scale bar: 40  $\mu\text{m}$ .



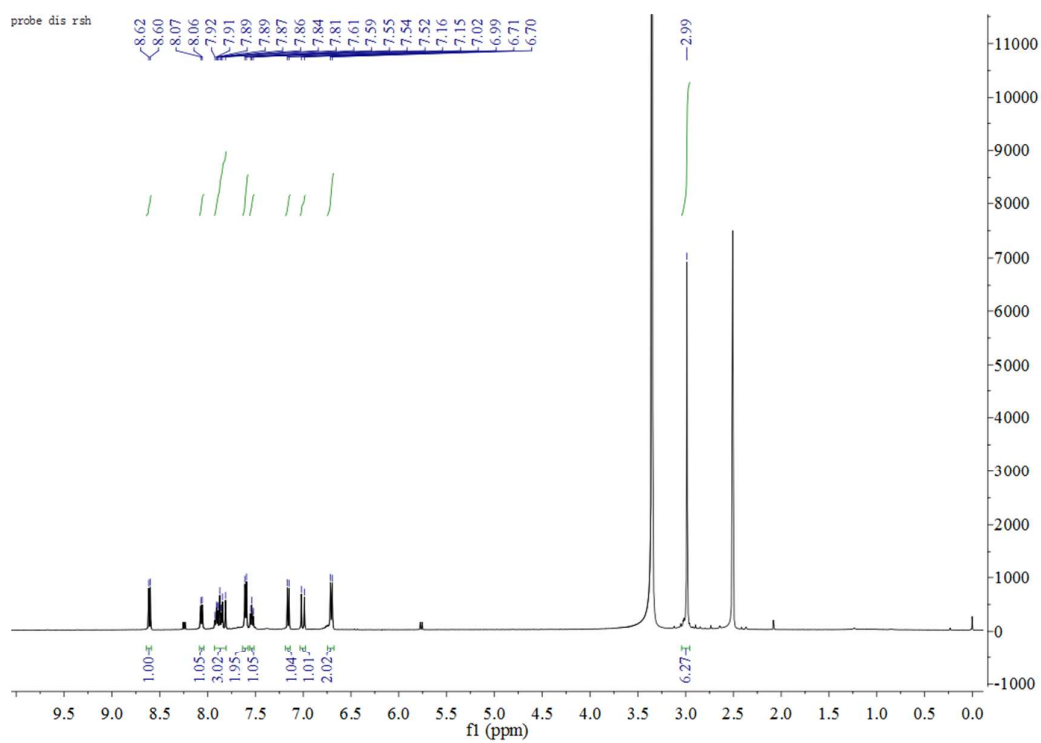

**Figure S25.**  $^1\text{H}$  NMR spectrum of NBD-OF.

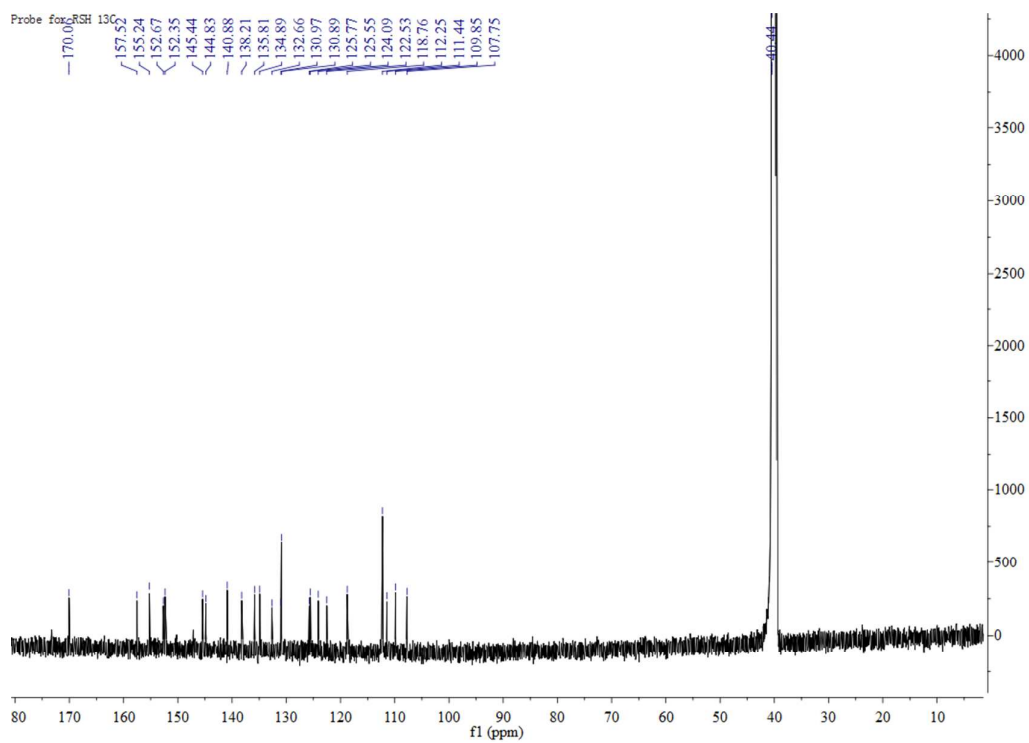

**Figure S26.**  $^{13}\text{C}$  NMR spectrum of NBD-OF.

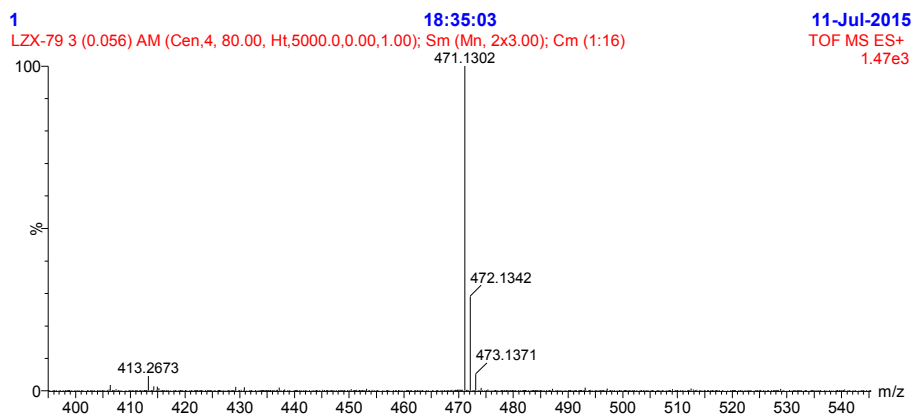

**Figure S27.** HRMS spectrum of NBD-OF.

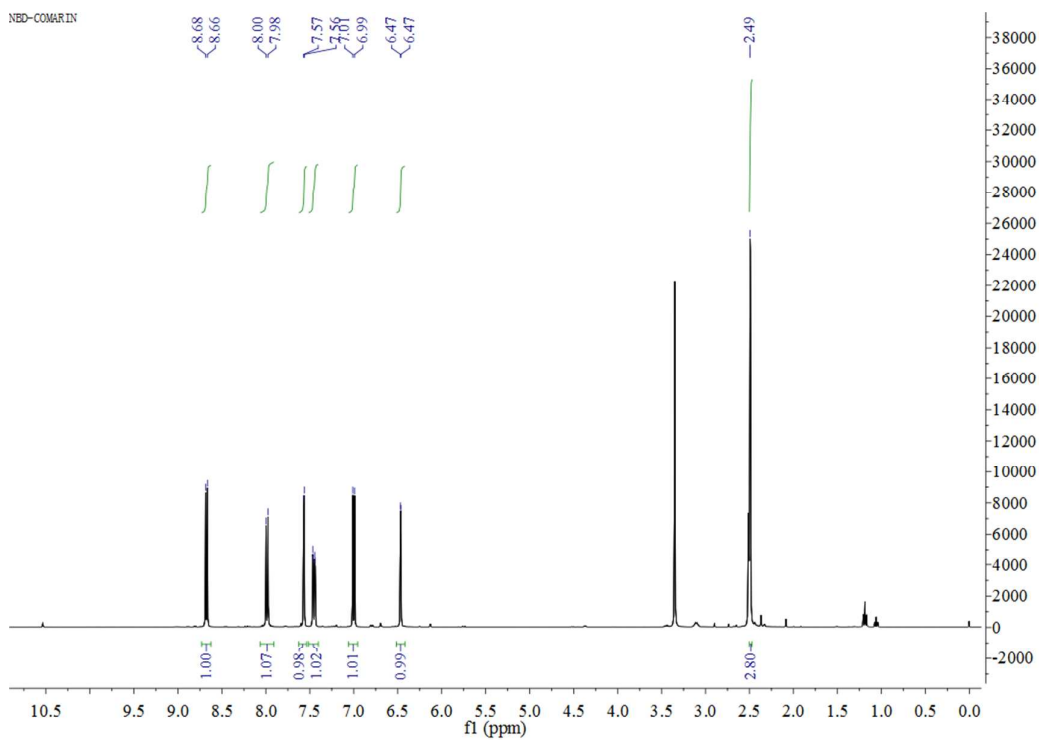

**Figure S28.**  $^1\text{H}$  NMR spectrum of NBD-OCoumarin.

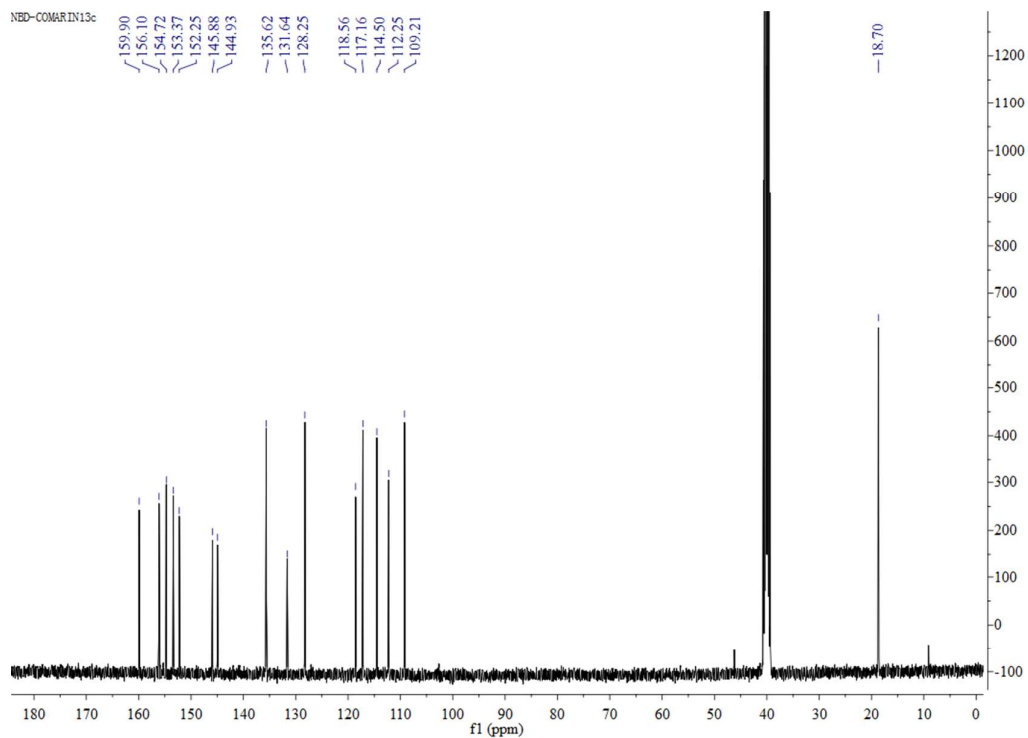

**Figure S29.**  $^{13}\text{C}$  NMR spectrum of NBD-OCoumarin.

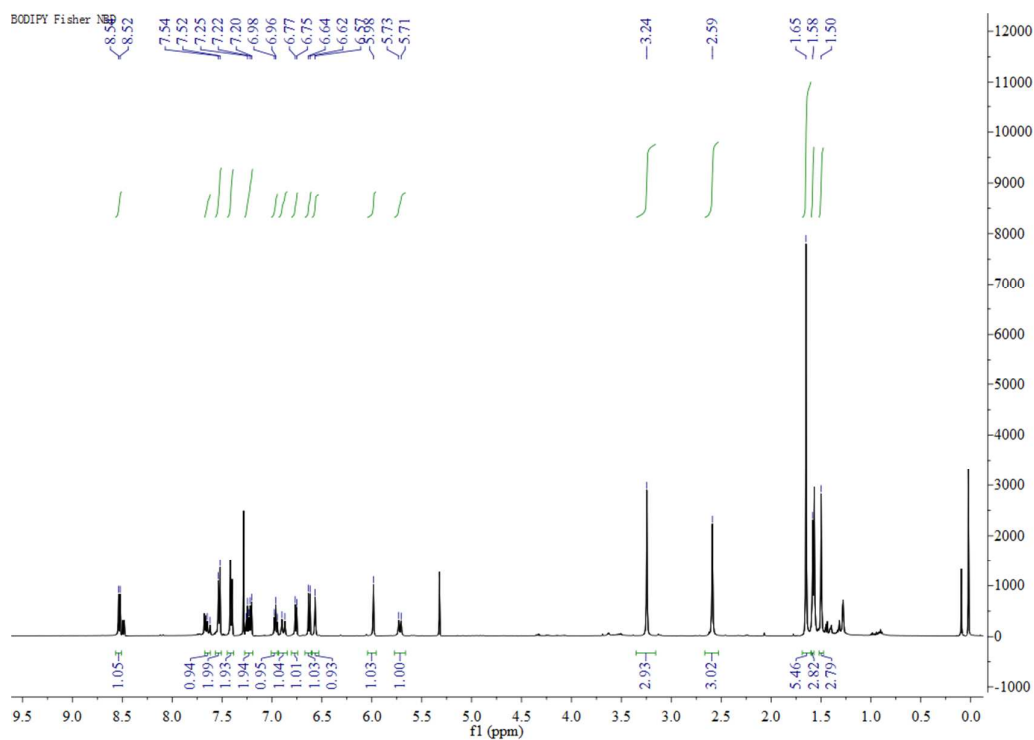

**Figure S30.**  $^1\text{H}$  NMR spectrum of NBD-OBodipy.

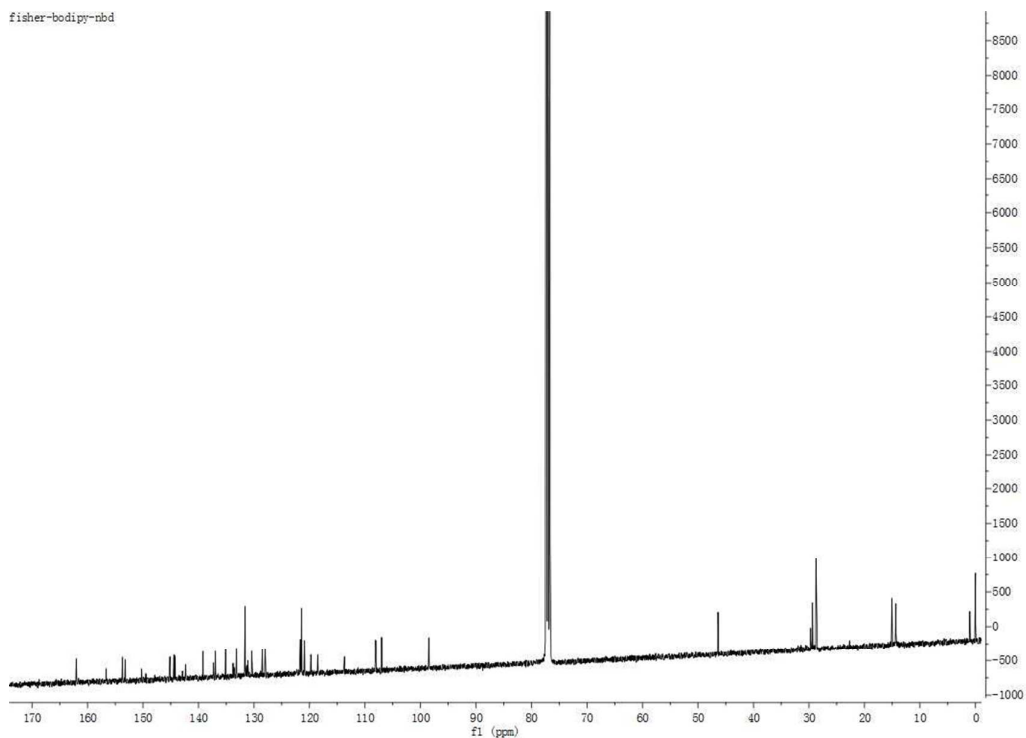

**Figure S31.**  $^{13}\text{C}$ NMR spectrum of NBD-OBodipy.

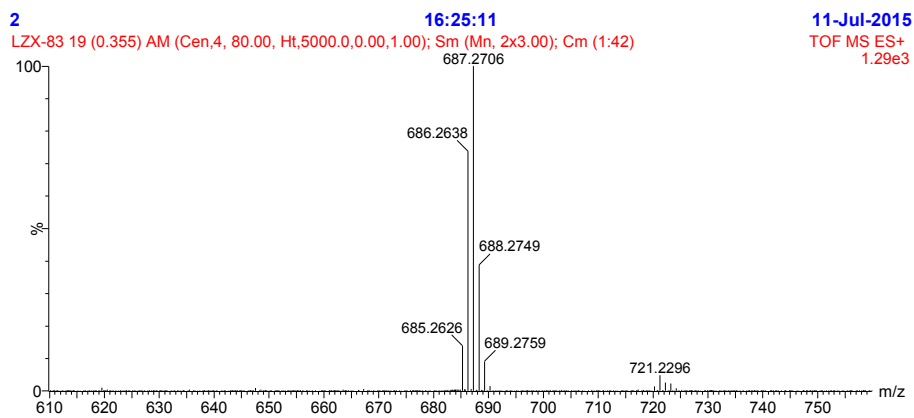

**Figure S32.** HRMS spectrum of NBD-OBodipy.
